# Supplementary material for: Quantifying Drivers of Coastal Forest Carbon Decline Highlights Opportunities for Targeted Human Interventions
Source: MDPI journal article supplement (doi:10.3390/land10070752), 2021-07-18
Supplement: s1 [file s1]

Archive with 1 entries (1 files):
- land-1285388-supplementary.pdf
