# Supplementary material for: Quantifying Drivers of Coastal Forest Carbon Decline Highlights Opportunities for Targeted Human Interventions
Source: MDPI journal article supplement (doi:10.3390/land10070752), 2021-07-18
Supplement: s1 [file s1 › land-1285388-supplementary.pdf]

**Table S1: LiDAR flight specifications.** LiDAR flight descriptions and specifications for source datasets used.

| Survey Date    | Altitude Above Ground | Program                       | Multiple Returns    | Swath Width | Scan Angle | RMSEz  | Average Post Spacing | Average Point Density |
|----------------|-----------------------|-------------------------------|---------------------|-------------|------------|--------|----------------------|-----------------------|
| Jan-March 2001 | 12,000FT              | NC Floodplain Mapping Program | 5 returns per pulse | 3,411m      | 25°        | 20cm   | 3m                   | 0.11/m <sup>2</sup>   |
| January 2014   | 5,499FT               | NC Floodplain Mapping Program | 4 returns per pulse | 1,025m      | 34°        | 11.7cm | 0.7m                 | 2.0/m <sup>2</sup>    |

**Table S2: Landsat imagery specifications.** Specifications of Landsat imagery for 2001 and 2014 along with Palmer Drought Severity Index (PDSI) for relative dryness that ranges from -10 (dry) to 10 (wet).

| Date       | Source         | Cloud Cover (%) | Precipitation (in) | PDSI* |
|------------|----------------|-----------------|--------------------|-------|
| 2000/11/28 | Landsat 7 ETM+ | 0.00            | 3.2                | -0.64 |
| 2013/11/24 | Landsat 8 OLI  | 0.10            | 3.59               | 0.9   |
| 2001/04/05 | Landsat ETM+   | 0.00            | 1.85               | -1.69 |
| 2014/04/01 | Landsat 8 OLI  | 36.43           | 4.73               | 1.61  |

**Table S3: Random Forest classification Landsat predictor variables.** Metrics used in the Random Forest classification and regression models, derived from spectral bands of Landsat data.

| Spectral Index | Description                                                                                                             |
|----------------|-------------------------------------------------------------------------------------------------------------------------|
| NDVI           | Normalized difference vegetation index                                                                                  |
| Average NDVI   | Average NDVI value of pixels from cloudless portions of all 32-day composites from May through August for 2001 and 2014 |
| Maximum NDVI   | Maximum NDVI value of pixels from cloudless portions of all 32-day composites from May through August for 2001 and 2014 |
| EVI            | Enhanced vegetation index                                                                                               |
| Average EVI    | Average EVI value of pixels from cloudless portions of all 32-day composites from May through August for 2001 and 2014  |
| Maximum EVI    | Maximum EVI values of pixels from cloudless portions of all 32-day composites from May through August for 2001 and 2014 |
| TCW            | Tasseled cap wetness index                                                                                              |
| TCB            | Tasseled cap brightness index                                                                                           |
| TCGRN          | Tasseled cap greenness index                                                                                            |

|            |                                                                      |
|------------|----------------------------------------------------------------------|
| TCWGD      | Difference between TCW and TCGRN                                     |
| Blue Band  | Band 1 in Landsat 7ETM+; Band 2 in Landsat 8OLI                      |
| Green Band | Band 2 in Landsat 7ETM+; Band 3 in Landsat 8OLI                      |
| NIR Band   | Near infrared; Band 4 in Landsat 7ETM+; Band 5 in Landsat 8OLI       |
| SWIR Band  | Short wave infrared; Band 7 in Landsat 7ETM+; Band 7 in Landsat 8OLI |

---

**Table S4: Random Forest classification LiDAR predictor variables.** Metrics used in the Random Forest classification and regression models, derived from LiDAR data by binning the appropriate statistics at 30-m grid resolution.

| Variable                         | Description                                                                  |
|----------------------------------|------------------------------------------------------------------------------|
| Mean Vegetation Height           | Mean value of non-ground points                                              |
| Median Vegetation Height         | Median value of non-ground points                                            |
| Maximum Vegetation Height        | Maximum value of non-ground points                                           |
| Std. Vegetation Height           | Standard deviation of non-ground point values                                |
| Standard Error Vegetation Height | Standard error of non-ground point values                                    |
| Minimum Vegetation Height        | Minimum value of non-ground points                                           |
| Variance Vegetation Height       | Variance of non-ground point values                                          |
| Vegetation Height Skewness       | Skewness of non-ground point values                                          |
| Vegetation Height Kurtosis       | Kurtosis of non-ground point values                                          |
| CV. Vegetation Heights           | Coefficient of variation of non-ground point values                          |
| Vegetation Density               | Non-ground returns/Non-ground returns + ground returns                       |
| Prop. Stratum 1                  | Proportion of non-ground points that are $\leq 4.5\text{m}$                  |
| Prop. Stratum 2                  | Proportion of non-ground points between $>4.5\text{m}$ and $\leq 10\text{m}$ |
| Prop. Stratum 3                  | Proportion of non-ground point between $>10\text{m}$ and $\leq 20\text{m}$   |
| Prop. Stratum 4                  | Proportion of non-ground points between $>20\text{m}$ and $\leq 30\text{m}$  |
| Prop. Stratum 5                  | Proportion of non-ground points $>30\text{m}$                                |
| Elevation                        | Ground elevation interpolated from ground points                             |
| Aspect                           | Aspect calculated from interpolated ground points                            |

Slope

Slope calculated from interpolated ground points

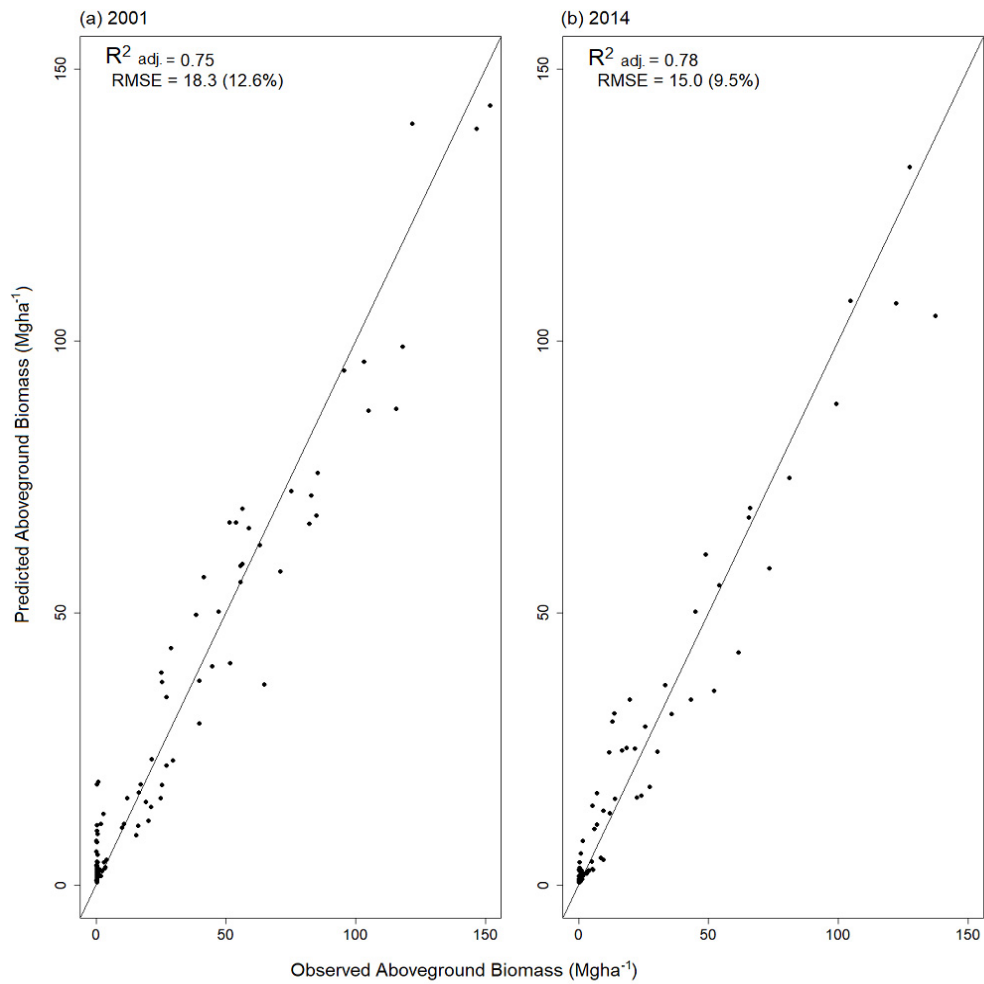

**Figure S1: Observed vs. predicted biomass.** Observed biomass (from the 98 field plots) plotted against the modeled Random Forest biomass estimates for (a) 2001 and (b) 2014.

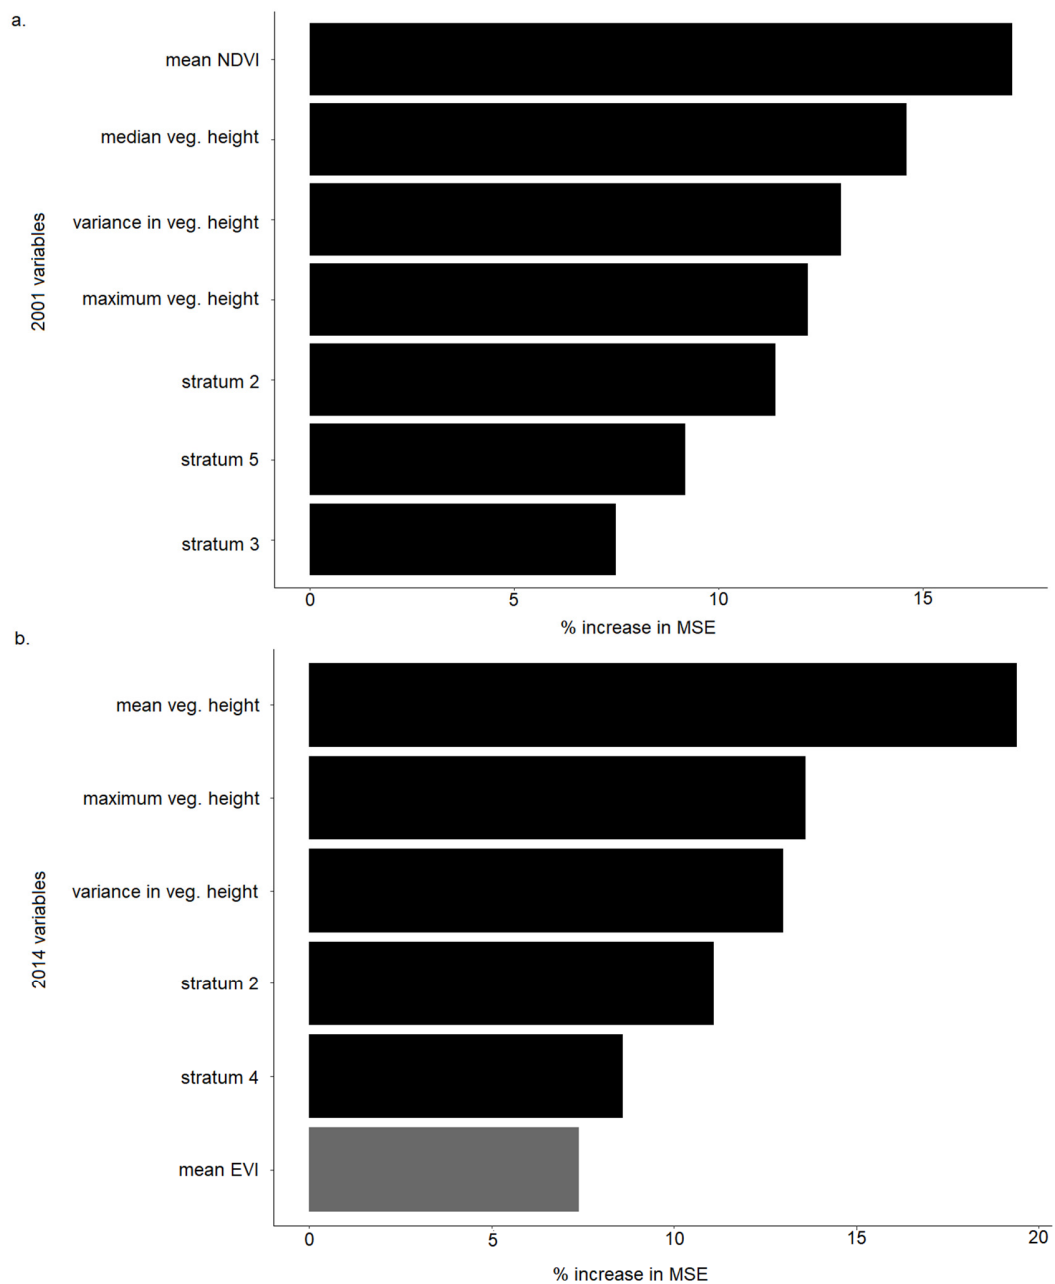

**Figure S2: Predictor variable permutation importance in RF classification.** Permutation importance of predictor variables derived from 1,000 permutations of the final fitted Random Forest models for (a) 2001 and (b) 2014. Percent increase in MSE is the increase in mean square error of predictions as a result of each variable being randomly permuted. The higher the increase, the more important the variable. Black color indicates contribution is statistically significant.

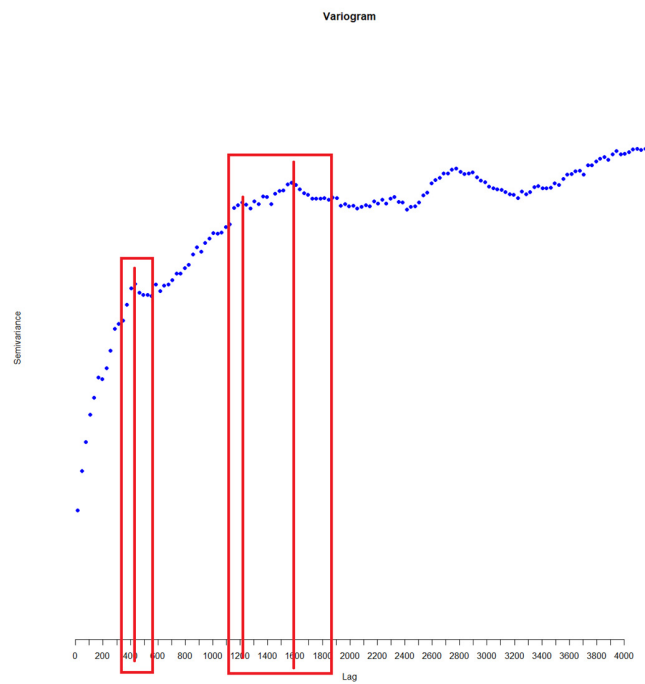

**Figure S3: Variogram.** Variogram used in the selection of modeling unit, or grid cell size. Initial plateau occurred at 450m<sup>2</sup>, which was selected as the modeling unit for further analysis.

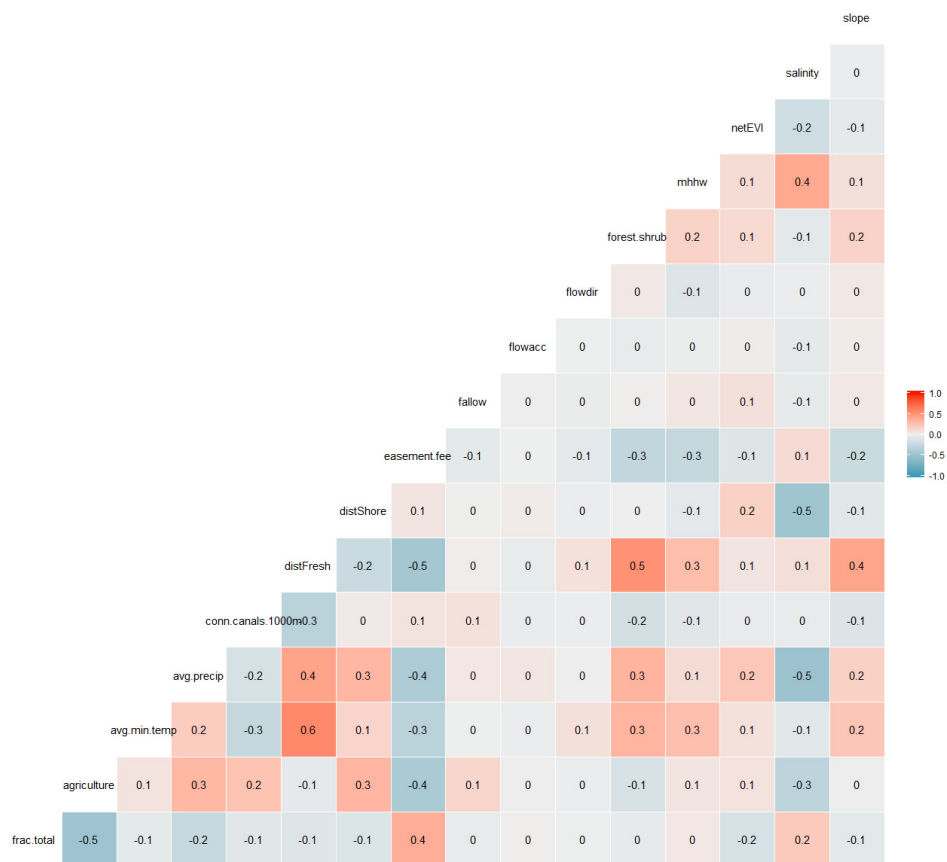

**Figure S4: Correlation matrix.** Correlation matrix of all potential predictor variables. The variables selected for further examination had correlation values  $< 0.50$ .
